# Supplementary material
Source: HighWire-hosted journal article supplement (https://drc.bmj.com/content/4/1/e000163)

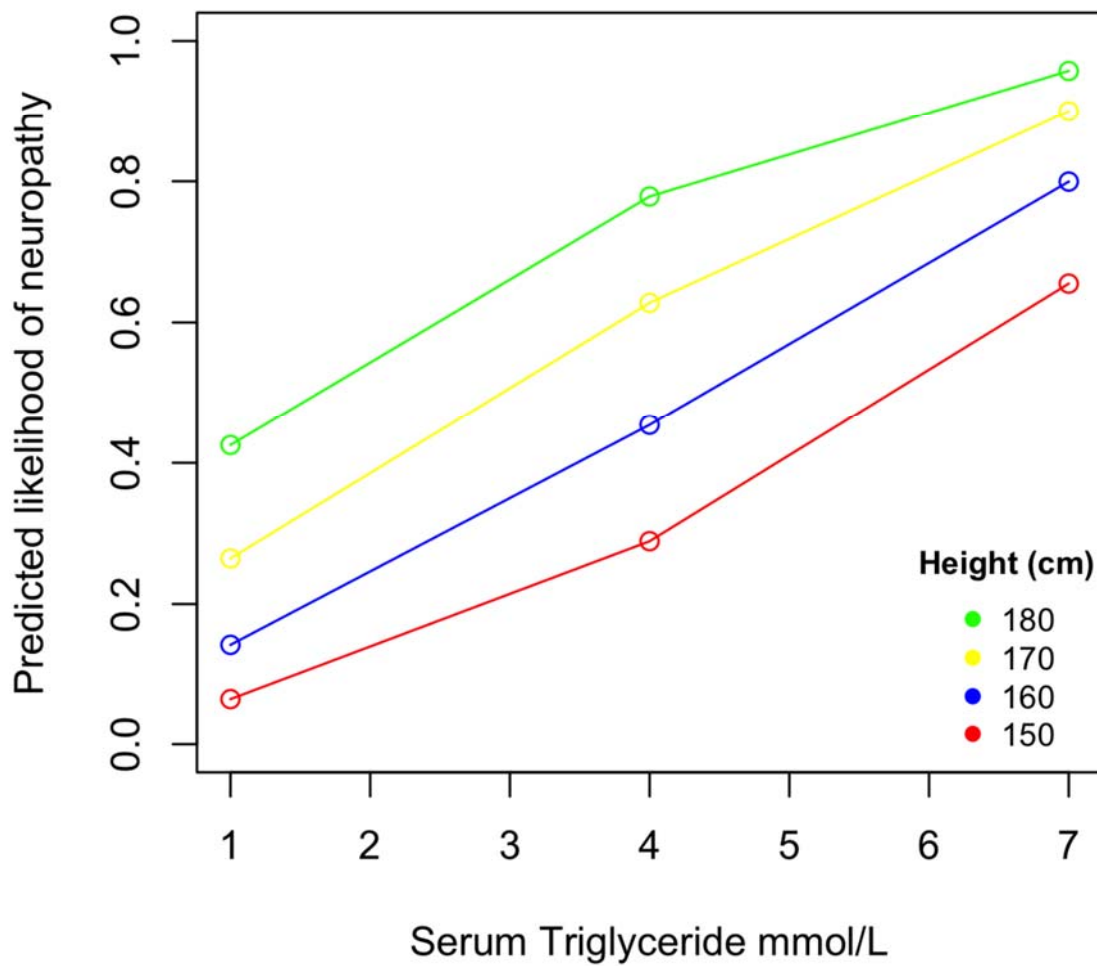

Supplement: inline-supplementary-material-5 [file inline-supplementary-material-5.pdf]
